# Supplementary material
Source: PubMed Central journal article supplement (PMC516482)

(A)

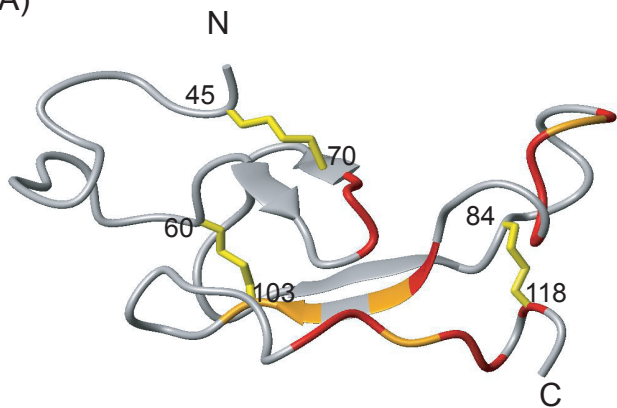

(B)

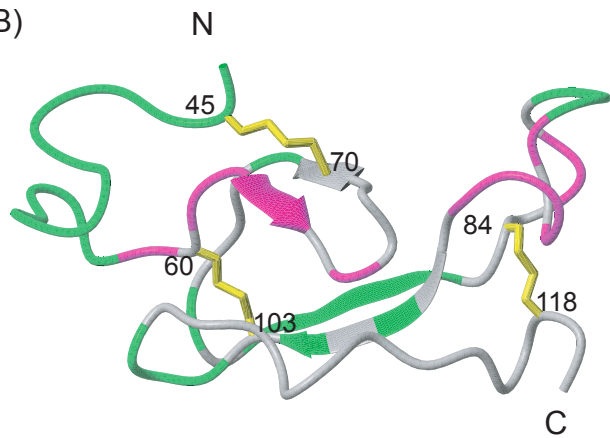

Supplement: pnas_101_35_12836__1.pdf [file pnas_101_35_12836__1.pdf]
